# Supplementary material for: Narbenmanagement bei Kindern und Jugendlichen
Source: Springer Nature journal article supplement (doi:10.1007/s41906-023-2143-1), 2023-09-14
Supplement: MOESM1 [file 26045370]

## Literatur

### zum Beitrag „Narbenmanagement bei Kindern und Jugendlichen“

von Ingo Königs, Miriam Fattouh, Konrad Reinshagen

*PflegeZeitschrift* (76) 10/2023, S. 24-27

- [1] Bayat A et al. Skin scarring. *BMJ*. 2003;326(7380):88-92
- [2] S2k-Leitlinie Therapie pathologischer Narben (hypertrophe Narben und Keloide). AWMF-Register-Nr.: 013-030
- [3] Maio G. Ästhetische Maßnahmen bei Minderjährigen – eine ethische Annäherung. In: Schiestl C et al. (Hrsg.). *Plastische Chirurgie bei Kindern und Jugendlichen*. Heidelberg/Berlin; Springer. 2017
- [4] [https://verbrennungsmedizin.de/files/dgv\\_files/pdf/schwerbrandverletztes-kind/Klinikliste.pdf](https://verbrennungsmedizin.de/files/dgv_files/pdf/schwerbrandverletztes-kind/Klinikliste.pdf)
- [5] Liuzzi F, Chadwick S, Shah M. Paediatric post-burn scar management in the UK: a national survey. *Burns*. 2015;41(2):252-6
- [6] Schneider JC et al. Pruritus in pediatric burn survivors: defining the clinical course. *J Burn Care Res*. 2015;36(1):151-8
- [7] O'Reilly S et al. Use of tape for the management of hypertrophic scar development: A comprehensive review. *Scars Burn Heal*. 2021;7:20595131211029206
- [8] Reiffel RS. Prevention of hypertrophic scars by long-term paper tape application. *Plast Reconstr Surg*. 1995;96(7):1715-8
- [9] Meaume S et al. Management of scars: updated practical guidelines and use of silicones. *Eur J Dermatol*. 2014;24(4):435-43
- [10] Pruksapong C, Burusapat C, Hongkarnjanakul N. Efficacy of silicone gel versus silicone gel sheet in hypertrophic scar prevention of deep hand burn patients with skin graft: a prospective randomized controlled trial and systematic review. *Plast Reconstr Surg Glob Open*. 2020;8(10):e3190
- [11] Suetake T et al. Functional analyses of the stratum corneum in scars. Sequential studies after injury and comparison among keloids, hypertrophic scars, and atrophic scars. *Arch Dermatol*. 1996;132(12):1453-8
- [12] Mustoe TA. Evolution of silicone therapy and mechanism of action in scar management. *Aesthetic Plast Surg*. 2008;32(1):82-92
- [13] Gilman TH. Silicone sheet for treatment and prevention of hypertrophic scar: a new proposal for the mechanism of efficacy. *Wound Repair Regen*. 2003;11(3):235-6
- [14] Hanasono MM et al. The effect of silicone gel on basic fibroblast growth factor levels in fibroblast cell culture. *Arch Facial Plast Surg*. 2004;6(2):88-93
- [15] Kuhn MA et al. Silicone sheeting decreases fibroblast activity and downregulates TGFbeta2 in hypertrophic scar model. *Int J Surg Investig*. 2001;2(6):467-74
- [16] Chernoff WG, Cramer H, Su-Huang S. The efficacy of topical silicone gel elastomers in the treatment of hypertrophic scars, keloid scars, and post-laser exfoliation erythema. *Aesthetic Plast Surg*. 2007;31(5):495-500
- [17] S2k-Leitlinie Thermische Verletzungen im Kindesalter (Verbrennung, Verbrühung), Behandlung. AWMF-Register-Nr.: 006–128

- [18] Monstrey S et al. Updated scar management practical guidelines: non-invasive and invasive measures. *J Plast Reconstr Aesthet Surg*. 2014;67(8):1017-25
- [19] Engrav LH et al. 12-year within-wound study of the effectiveness of custom pressure garment therapy. *Burns*. 2010;36(7):975-83
- [20] Macintyre L, Baird M. Pressure garments for use in the treatment of hypertrophic scars--a review of the problems associated with their use. *Burns*. 2006;32(1):10-5
- [21] Kim JY et al. Burn scar biomechanics after pressure garment therapy. *Plast Reconstr Surg*. 2015;136(3):572-81
- [22] Renò F et al. In vitro mechanical compression induces apoptosis and regulates cytokines release in hypertrophic scars. *Wound Repair Regen*. 2003;11(5):331-6
- [23] Ripper S et al. Adherence to pressure garment therapy in adult burn patients. *Burns*. 2009;35(5):657-64
- [24] DeBruler DM et al. role of early application of pressure garments following burn injury and autografting. *Plast Reconstr Surg*. 2019;143(2):310e-21e
- [25] Joo SY et al. Clinical utility of the portable pressure-measuring device for compression garment pressure measurement on hypertrophic scars by burn injury during compression therapy. *J Clin Med*. 2022;11(22):6743
- [26] [https://verbrennungsmedizin.de/files/dgv\\_files/pdf/jahresbericht/Jahresbericht%202022%20gesamt.pdf](https://verbrennungsmedizin.de/files/dgv_files/pdf/jahresbericht/Jahresbericht%202022%20gesamt.pdf)
- [27] Masnari O et al. Self- and parent-perceived stigmatisation in children and adolescents with congenital or acquired facial differences. *J Plast Reconstr Aesthet Surg*. 2012;65(12):1664-70
- [28] Janis JE, Kwon RK, Attinger CE. The new reconstructive ladder: modifications to the traditional model. *Plast Reconstr Surg*. 2011;127 Suppl 1:205S-12S
- [29] Yang S, Luo YJ, Luo C. Network meta-analysis of different clinical commonly used drugs for the treatment of hypertrophic scar and keloid. *Front Med (Lausanne)*. 2021;8:691628
- [30] Aggarwal H et al. Treatment of keloids and hypertrophic scars using bleom. *J Cosmet Dermatol*. 2008;7(1):43-9
- [31] Margaret Shanthi FX, Ernest K, Dhanraj P. Comparison of intralesional verapamil with intralesional triamcinolone in the treatment of hypertrophic scars and keloids. *Indian J Dermatol Venereol Leprol*. 2008;74(4):343-8
- [32] Parrett BM, Donelan MB. Pulsed dye laser in burn scars: current concepts and future directions. *Burns*. 2010;36(4):443-9
- [33] Issler-Fisher AC, Waibel JS, Donelan MB. Laser modulation of hypertrophic scars: technique and practice. *Clin Plast Surg*. 2017;44(4):757-66
- [34] Vrijman C et al. Laser and intense pulsed light therapy for the treatment of hypertrophic scars: a systematic review. *Br J Dermatol*. 2011;165(5):934-42
- [35] Patel SP et al. Fractional CO2 laser treatment outcomes for pediatric hypertrophic burn scars. *J Burn Care Res*. 2019;40(4):386-91
- [36] Zuccaro J et al. Laser therapy for pediatric burn scars: focusing on a combined treatment approach. *J Burn Care Res*. 2018;39(3):457-62
- [37] Kubiak R, Lange B. Percutaneous collagen induction as an additive treatment for scar formation following thermal injuries: Preliminary experience in 47 children. *Burns*. 2017;43(5):1097-102
- [38] Hirshowitz B et al. Combined double Z-plasty and Y-V advancement for thumb web contracture. *Hand*. 1975;7(3):291-3
- [39] Gonzalez SR, Wolter KG, Yuen JC. Infectious complications associated with the use of integra: a systematic review of the literature. *Plast Reconstr Surg Glob Open*. 2020;8(7):e2869

- [40] Lo CH et al. Wound healing and dermal regeneration in severe burn patients treated with NovoSorb® Biodegradable Temporising Matrix: A prospective clinical study. *Burns*. 2022;48(3):529-38
- [41] Boyce ST et al. Randomized, paired-site comparison of autologous engineered skin substitutes and split-thickness skin graft for closure of extensive, full-thickness burns. *J Burn Care Res*. 2017;38(2):61-70
- [42] Meuli M et al. A cultured autologous dermo-epidermal skin substitute for full-thickness skin defects: a phase i, open, prospective clinical trial in children. *Plast Reconstr Surg*. 2019;144(1):188-98
- [43] Yeşilada AK et al. The feasibility of tissue expansion in reconstruction of congenital and aquired deformities of pediatric patients. *Int J Burns Trauma*. 2013;3(3):144-50
- [44] Böttcher-Haberzeth S et al. Osmotic expanders in children: no filling--no control--no problem? *Eur J Pediatr Surg*. 2011;21(3):163-7
