# Supplementary material for: Narbenmanagement bei Kindern und Jugendlichen
Source: Springer Nature journal article supplement (doi:10.1007/s41906-023-2143-1), 2023-09-14
Supplement: MOESM2 [file 26045370]

## Tabelle 1

### zum Beitrag „Narbenmanagement bei Kindern und Jugendlichen“

von Ingo Königs, Miriam Fattouh, Konrad Reinshagen

PflegeZeitschrift (76) 10/2023, S. 24-27

| <b>Merkmal</b>                   | <b>Hypertrophe Narbe</b>                                                                                                | <b>Keloid</b>                                                                                                                                       |
|----------------------------------|-------------------------------------------------------------------------------------------------------------------------|-----------------------------------------------------------------------------------------------------------------------------------------------------|
| <b>Inzidenz</b>                  | Häufig                                                                                                                  | Selten, steigt mit zunehmender Hautpigmentierung                                                                                                    |
| <b>Ausdehnung</b>                | Auf ursprüngliche Verletzung beschränkt                                                                                 | Wächst über ursprüngliche Läsion hinaus                                                                                                             |
| <b>Rückbildung</b>               | Häufig                                                                                                                  | Nein                                                                                                                                                |
| <b>Vorangegangene Verletzung</b> | Ja                                                                                                                      | Ja, wobei oftmals vom Patienten unbemerkte „Minimaltraumata“                                                                                        |
| <b>Lokalisation</b>              | Gesamtes Integument                                                                                                     | Gesamtes Integument, häufig Ohrläppchen, Sternum, Nacken                                                                                            |
| <b>Genetische Prädisposition</b> | Nicht bekannt                                                                                                           | Ja                                                                                                                                                  |
| <b>Histologie</b>                | $\alpha$ -Aktin positive Myofibroblasten<br>Kollagenfasern in wellenförmigen Mustern, parallel zur Epidermis angeordnet | Verminderte Apoptose<br>Vermehrte Gefäßbildung<br>Dicke Kollagenfasern, teils parallel zur Epidermis, teils knotig angeordnet<br>Zellarm im Zentrum |

Tab. 1: Unterschiedliche Merkmale von hypertrophen Narben und Keloiden [2,3]
