# Supplementary material for: Narbenmanagement bei Kindern und Jugendlichen
Source: Springer Nature journal article supplement (doi:10.1007/s41906-023-2143-1), 2023-09-14
Supplement: MOESM3 [file 26045370]

## Tabelle 3

### zum Beitrag „Narbenmanagement bei Kindern und Jugendlichen“

von Ingo Königs, Miriam Fattouh, Konrad Reinshagen

*PflegeZeitschrift* (76) 10/2023, S. 24-27

|                                 | <b>Silikonfolie</b>                                                                                            | <b>Silikongel</b>                                               | <b>Silikonpelotten<br/>(Sonderproduktion)</b>                                                                                                                       | <b>Silikongesichtsmasken<br/>und -halskragen<br/>(Sonderproduktion)</b>                                                                         |
|---------------------------------|----------------------------------------------------------------------------------------------------------------|-----------------------------------------------------------------|---------------------------------------------------------------------------------------------------------------------------------------------------------------------|-------------------------------------------------------------------------------------------------------------------------------------------------|
| <b>Applikation</b>              | 12–24<br>Stunden pro<br>Tag                                                                                    | Applikation<br>zweimal täglich                                  | 12–24 Stunden pro Tag                                                                                                                                               | 12–24 Stunden pro Tag                                                                                                                           |
| <b>Dauer der<br/>Behandlung</b> | 3–12 Monate                                                                                                    | 3–12 Monate                                                     | 3–12 Monate                                                                                                                                                         | 3–12 Monate                                                                                                                                     |
| <b>Körperbereich</b>            | Flächige<br>Narben<br>Bedingt<br>geeignet über<br>Gelenke<br>Bedingt<br>geeignet an<br>sichtbaren<br>Bereichen | Gesichtsbereich<br>Hände und<br>Füße<br>Geeignet an<br>Gelenken | Unebene Narben (ggf.<br>mit Eintiefungen)<br>Geeignet über Gelenke<br>(z. B. Finger, Hände,<br>Füße)<br>In Kombination mit<br>Kompressionstherapie<br>zur Fixierung | Gesicht<br>Kinn-Hals-Schulteransatz<br>auch als eigenständige<br>Kompressionsversorgung<br>ohne zusätzliche<br>Kompressionsbandage<br>anwendbar |
| <b>Reinigung</b>                | Täglich mit<br>milder Seife                                                                                    |                                                                 | Täglich mit milder Seife<br>HTV-Silikone sind bis 140 °C auskochbar                                                                                                 |                                                                                                                                                 |

**Tabelle 3: Narbenmanagement mit Silikonprodukten [17]**
